# Supplementary material for: Retrospective study revealed that Zn relate to improvement of swallowing function in the older adults
Source: Springer Nature journal article supplement (doi:10.1186/s12877-021-02224-8), 2021-04-26
Supplement: MOESM2 [file 19106558]

| ID | MMSE | PS | Gender | S-SPT | Alb   | TP  | LYP   | Hb   | WBC   | Hb    | TG   | Cho | BUN  | CRE  | Zn   | Disease              | Age                              | PPI   | TC   | RA drug | levodopa | prosemid | E inhibit | NSAID | Body Weight | Zn (B) | TC (B) | Alb (B) | S-SPT (B) | BMI (B) | BW (B) | Zn (A) | TC (A) | Alb (A) | S-SPT (A) | BMI (A) | BW (A) |  |  |  |  |  |
|----|------|----|--------|-------|-------|-----|-------|------|-------|-------|------|-----|------|------|------|----------------------|----------------------------------|-------|------|---------|----------|----------|-----------|-------|-------------|--------|--------|---------|-----------|---------|--------|--------|--------|---------|-----------|---------|--------|--|--|--|--|--|
| 1  | 0    | 4  | F      | 36.3  | 3.2   | 6.1 | 1183  | 34.1 | 6800  | 11.7  | 48   | 148 | 6.9  | 0.35 | 44   | AD                   | 84                               | -     | -    | -       | -        | -        | -         | -     | 35.8        | 44     | 148    | 3.2     | 36.3      | 17.7    | 38.6   | 66     | 162    | 2.6     | 3.89      | 15.9    | 34.5   |  |  |  |  |  |
| 2  | 0    | 4  | F      | 3.48  | 3.3   | 6.3 | 1386  | 38.6 | 10500 | 12.6  | 271  | 194 | 13.4 | 0.46 | 52   | AD                   | 85                               | -     | -    | -       | -        | -        | -         | -     | 39          | 52     | 194    | 3.3     | 3.48      | 21.2    | 38.2   | 84     | 128    | 2.4     | 1.57      | 20.9    | 37.6   |  |  |  |  |  |
| 3  | 2    | 3  | F      | 4.23  | 3.4   | 5.8 | 1348  | 37.4 | 4200  | 12.6  | 311  | 265 | 18.3 | 0.74 | 51   | AD                   | 83                               | -     | -    | -       | -        | -        | -         | -     | 51.5        | 51     | 265    | 3.4     | 4.23      | 25.9    | 53     | 78     | 28.5   | 3.7     | 3.17      | 25.8    | 52.8   |  |  |  |  |  |
| 4  | 1    | 4  | M      | 60    | 3     | 5.9 | 528   | 36.4 | 4400  | 12.2  | 51   | 129 | 11.2 | 0.77 | 55   | AD                   | 86                               | -     | -    | -       | -        | -        | -         | -     | 49.7        | 55     | 129    | 3       | 60        | 16.1    | 47.3   | 80     | 133    | 2.9     | 1.6       | 18.5    | 47.3   |  |  |  |  |  |
| 5  | 10   | 4  | M      | 6.15  | 2.9   | 5.7 | 2059  | 35.5 | 7200  | 11.6  | 98   | 144 | 25   | 0.88 | 49   | AD,CD                | 91                               | -     | -    | -       | -        | -        | -         | -     | 37.3        | 49     | 144    | 2.9     | 6.15      | 17.3    | 39.9   | 90     | 140    | 2.9     | 2.74      | 17.6    | 40.7   |  |  |  |  |  |
| 6  | 3    | 4  | M      | 14.47 | 3.9   | 6.8 | 975.6 | 30.9 | 3600  | 10.6  | 49   | 133 | 11.6 | 0.72 | 59   | mental retardation   | 75                               | -     | -    | -       | -        | -        | -         | -     | 41.5        | 59     | 133    | 3.9     | 14.47     | 17.6    | 42.9   | 85     | 132    | 4       | 2         | 17.6    | 42.8   |  |  |  |  |  |
| 7  | 2    | 4  | F      | 36.29 | 3.4   | 6.1 | 1459  | 34   | 5700  | 11.6  | 142  | 176 | 9.9  | 0.53 | 51   | CD                   | 84                               | -     | -    | -       | -        | -        | -         | -     | 41.5        | 51     | 176    | 3.4     | 36.29     | 19.5    | 42.4   | 73     | 140    | 3.2     | 2.43      | 20.2    | 43.8   |  |  |  |  |  |
| 8  | 11   | 4  | M      | 2.78  | 3.4   | 6.1 | 1872  | 36.6 | 5200  | 12.6  | 105  | 243 | 6.9  | 0.66 | 39   | AD                   | 93                               | +     | -    | -       | -        | -        | -         | -     | 66.8        | 39     | 243    | 2.8     | 2.78      | 23      | 64.1   | 81     | 197    | 3       | 60        | 22.3    | 62.5   |  |  |  |  |  |
| 9  | 2    | 4  | F      | 4.12  | 3.4   | 6.5 | 1283  | 43   | 4900  | 13.9  | 111  | 224 | 11.6 | 0.44 | 56   | AD                   | 94                               | +     | -    | -       | -        | -        | -         | -     | 47.2        | 56     | 224    | 3.4     | 4.12      | 25      | 45.9   | 88     | 228    | 3.3     | 10.78     | 24.9    | 45.7   |  |  |  |  |  |
| 10 | 0    | 4  | F      | 2.72  | 3     | 5.9 | 841.5 | 32.7 | 3300  | 10.6  | 86   | 169 | 17.8 | 0.59 | 47   | CD                   | 96                               | -     | -    | -       | -        | -        | -         | -     | 34.8        | 47     | 169    | 3       | 2.72      | 20.3    | 37.8   | 102    | 182    | 3.2     | 1.85      | 20.3    | 37.7   |  |  |  |  |  |
| 11 | 13   | 4  | M      | 60    | 2.6   | 5.1 | 1368  | 35.5 | 6000  | 12    | 45   | 194 | 13.5 | 0.96 | 42   | CD                   | 89                               | -     | -    | -       | -        | -        | -         | -     | 44.4        | 42     | 194    | 2.6     | 60        | 19.7    | 43.7   | 65     | 187    | 2.3     | 6.07      | 18.3    | 40.7   |  |  |  |  |  |
| 12 | 14   | 4  | F      | 4.37  | 3.2   | 5.9 | 474.5 | 38.8 | 6500  | 13.3  | 63   | 169 | 14.1 | 0.7  | 33   | CD                   | 75                               | +     | -    | -       | -        | -        | -         | -     | 30.8        | 33     | 169    | 3.2     | 4.37      | 13.7    | 31.6   | 65     | 139    | 3.5     | 2.88      | 13.5    | 31.1   |  |  |  |  |  |
| 13 | 1    | 4  | M      | 4.23  | 3.6   | 7   | 1200  | 34.5 | 4800  | 11.4  | 73   | 188 | 10.2 | 0.72 | 56   | AD                   | 88                               | -     | -    | -       | -        | -        | -         | -     | 44.7        | 56     | 188    | 3.6     | 4.23      | 16.8    | 45.6   | 92     | 175    | 3.4     | 8.07      | 16.5    | 44.7   |  |  |  |  |  |
| 14 | 10   | 4  | M      | 4.98  | 3     | 6.2 | 1095  | 36.3 | 7400  | 12.4  | 90   | 139 | 17.1 | 0.69 | 50   | deafness             | 98                               | -     | -    | -       | -        | -        | -         | -     | 53.2        | 50     | 139    | 3       | 4.98      | NA      | 53.2   | 49     | 109    | 2.6     | NA        | NA      | NA     |  |  |  |  |  |
| 15 | 4    | 4  | M      | 2.43  | 3.3   | 7.2 | 1652  | 32   | 6800  | 10.4  | 89   | 146 | 19.6 | 1.21 | 54   | AD                   | 93                               | -     | -    | -       | -        | -        | -         | -     | 42.5        | 54     | 146    | 3.3     | 2.43      | 17.6    | 43.4   | 37     | 86     | 2.4     | 3.03      | 15.6    | 38.6   |  |  |  |  |  |
| 16 | 6    | 4  | F      | 7.8   | 3     | 6.3 | 2956  | 37.6 | 7600  | 12.5  | 231  | 220 | 18.3 | 0.57 | 51   | AD                   | 85                               | -     | -    | -       | -        | -        | -         | -     | 54.7        | 51     | 220    | 3       | 7.8       | 23.8    | 52.1   | 100    | 233    | 3.1     | 5.14      | 23.4    | 51.3   |  |  |  |  |  |
| 17 | 0    | 4  | F      | 45.98 | 3.3   | 6.6 | 1710  | 25.2 | 3600  | 8.2   | 108  | 144 | 26.9 | 1.22 | 59   | AD                   | 88                               | -     | -    | -       | -        | -        | -         | -     | 39.7        | 59     | 144    | 3.3     | 45.98     | 16.1    | 36.3   | 98     | 136    | 3.6     | 31.96     | 16      | 35.9   |  |  |  |  |  |
| 18 | 10   | 4  | M      | 32    | 3.7   | 7   | 1474  | 35.7 | 5400  | 12.2  | 79   | 175 | 11.6 | 0.72 | 49   | AD,CD                | 69                               | -     | -    | -       | -        | -        | -         | -     | 50.3        | 49     | 175    | 3.7     | 32        | 19.5    | 50.9   | 59     | 166    | 3.2     | 10.58     | 19.7    | 51.1   |  |  |  |  |  |
| 19 | 10   | 4  | F      | 14.5  | 2.4   | 5.5 | 1949  | 24.4 | 6700  | 7.7   | 124  | 130 | 12.5 | 0.52 | 33   | AD                   | 93                               | -     | -    | -       | -        | -        | -         | -     | 55.3        | 33     | 130    | 2.4     | 14.5      | 24.2    | 55.9   | 73     | 122    | 2.3     | 8.59      | 24.2    | 56     |  |  |  |  |  |
| 20 | 9    | 4  | F      | 32    | 3.1   | 6   | 1586  | 36.4 | 5200  | 11.7  | 123  | 202 | 13.5 | 0.87 | 49   | AD                   | 96                               | -     | -    | -       | -        | -        | -         | -     | 34.7        | 49     | 202    | 3.1     | 32        | 16.1    | 36.2   | 117    | 223    | 3.4     | 5.45      | 16.1    | 36.3   |  |  |  |  |  |
| 21 | 0    | 4  | F      | 1.84  | 3.2   | 6.4 | NA    | 36.3 | 4500  | 11.9  | 116  | 206 | 19.1 | 0.48 | 59   | AD, brain hemorrhage | 85                               | -     | -    | -       | -        | -        | -         | -     | 29.7        | 59     | 206    | 3.2     | 1.84      | 13.7    | 29.7   | 74     | 221    | 3.5     | 4.28      | 13.7    | 29.6   |  |  |  |  |  |
| 22 | 0    | 4  | F      | 7.32  | 3     | 5.9 | NA    | 30.1 | 6500  | 9.5   | 104  | 163 | 19.1 | 0.89 | 50   | AD                   | 84                               | +     | -    | -       | -        | -        | -         | -     | 39.1        | 50     | 163    | 3       | 7.32      | 21.1    | 39.1   | 70     | 176    | 3.8     | 10.19     | 21.1    | 39     |  |  |  |  |  |
|    |      |    |        |       |       |     |       |      |       |       |      |     |      |      |      |                      |                                  | 4     | 0    | 0       | 0        | 3        | 3         | 2     |             |        |        |         |           |         |        |        |        |         |           |         |        |  |  |  |  |  |
|    |      |    |        |       |       |     |       |      |       |       |      |     |      |      |      |                      |                                  | 18.2% | 0.0% | 0.0%    | 0.0%     | 13.6%    | 13.6%     | 9.1%  |             |        |        |         |           |         |        |        |        |         |           |         |        |  |  |  |  |  |
| 23 | 14   | 2  | F      | 3.99  | 3.5   | 6.2 | 1148  | 38.4 | 4300  | 12.8  | 158  | 169 | 13.5 | 0.54 | 61   | AD                   | 94                               | -     | -    | -       | -        | -        | -         | -     | 43.1        |        |        |         |           |         |        |        |        |         |           |         |        |  |  |  |  |  |
| 24 |      | 21 | 3      | F     | 13.9  | 3.7 | 7     | 1787 | 42.1  | 10900 | 14.3 | 128 | 232  | 17.8 | 0.71 | 85                   | AD, Congenital hip joint Disease | 84    | -    | -       | -        | -        | -         | -     | -           | 38.5   |        |         |           |         |        |        |        |         |           |         |        |  |  |  |  |  |
| 25 |      | 9  | 4      | F     | 36.35 | 3.5 | 5.9   | 1529 | 41.6  | 6400  | 13.5 | 77  | 187  | 22.1 | 0.45 | 64                   | Femoral head and neck fracture   | 98    | -    | -       | -        | -        | -         | -     | -           | 36.1   |        |         |           |         |        |        |        |         |           |         |        |  |  |  |  |  |
| 26 | 0    | 4  | F      | 3     | 3.6   | 5.8 | 939.6 | 30.5 | 5400  | 12.5  | 129  | 236 | 13.2 | 0.79 | 67   | AD                   | 84                               | -     | -    | -       | -        | -        | -         | -     | 37.8        |        |        |         |           |         |        |        |        |         |           |         |        |  |  |  |  |  |
| 27 | 0    | 4  | F      | 2.22  | 3.7   | 7.3 | 1885  | 38.5 | 5000  | 12.9  | 249  | 182 | 10   | 0.72 | 74   | AD,CD                | 90                               | -     | -    | -       | -        | -        | -         | -     | 45.7        |        |        |         |           |         |        |        |        |         |           |         |        |  |  |  |  |  |
| 28 | 0    | 4  | F      | 5.32  | 3.5   | 7   | 3229  | 40.1 | 8800  | 13    | 127  | 169 | 8.1  | 0.63 | 64   | AD,CD                | 82                               | -     | -    | -       | -        | -        | -         | -     | 41          |        |        |         |           |         |        |        |        |         |           |         |        |  |  |  |  |  |
| 29 | 4    | 4  | F      | 2.84  | 3.1   | 5.2 | 579.6 | 40   | 6900  | 13.9  | 56   | 125 | 12.5 | 0.67 | 63   | lewy body disease    | 92                               | -     | -    | -       | -        | -        | -         | -     | 40.2        |        |        |         |           |         |        |        |        |         |           |         |        |  |  |  |  |  |
| 30 | 0    | 4  | F      | 6.34  | 2.6   | 5.5 | 1632  | 30.7 | 5300  | 9.4   | 83   | 132 | 11   | 0.51 | 67   | AD                   | 95                               | -     | -    | -       | -        | -        | -         | -     | 43.3        |        |        |         |           |         |        |        |        |         |           |         |        |  |  |  |  |  |
| 31 | 0    | 4  | F      | 2.82  | 3.3   | 6.7 | 619.4 | 42.1 | 3800  | 13.9  | 99   | 171 | 5.5  | 0.7  | 67   | AD,CD                | 82                               | -     | -    | -       | -        | -        | -         | -     | 57.6        |        |        |         |           |         |        |        |        |         |           |         |        |  |  |  |  |  |
| 32 | 1    | 4  | M      | 15    | 3.9   | 6.8 | 123   | 33.5 | 4100  | 10.8  | 84   | 166 | 13.2 | 0.65 | 64   | AD                   | 90                               | -     | -    | -       | -        | -        | -         | -     | 46.8        |        |        |         |           |         |        |        |        |         |           |         |        |  |  |  |  |  |
| 33 | 9    | 3  | F      | 3.3   | 3.7   | 6.5 | 2180  | 34   | 7900  | 11.3  | 97   | 143 | 11.7 | 0.9  | 77   | AD                   | 87                               | +     | -    | -       | -        | -        | -         | -     | 55          |        |        |         |           |         |        |        |        |         |           |         |        |  |  |  |  |  |
| 34 | 17   | 3  | F      | 2.5   | 3.4   | 5.7 | 1915  | 38.3 | 5700  | 12.1  | 119  | 161 | 18.3 | 0.75 | 76   | AD                   | 94                               | +     | -    | -       | -        | -        | -         | -     | 55.6        |        |        |         |           |         |        |        |        |         |           |         |        |  |  |  |  |  |
| 35 | 5    | 4  | M      | 3.62  | 3.8   | 7.4 | NA    | 37   | 6300  | 12    | 202  | 227 | 25.3 | 1.3  | 64   | AD                   | 85                               | -     | -    | -       | -        | -        | -         | -     | 58          |        |        |         |           |         |        |        |        |         |           |         |        |  |  |  |  |  |
| 36 | 24   | 2  | F      | 6.62  | 3.8   | 6.6 | 2053  | 30.9 | 6800  | 9.4   | 87   | 205 | 38.5 | 1.67 | 59   | AD                   | 92                               | -     | -    | -       | -        | -        | -         | -     | 61.5        |        |        |         |           |         |        |        |        |         |           |         |        |  |  |  |  |  |
| 37 | 15   | 3  | M      | 2.3   | 3.8   | 7.3 | 1237  | 43.3 | 4600  | 14.7  | 161  | 187 | 23.8 | 1.78 | 75   | CD                   | 82                               | +     | -    | -       | -        | -        | -         | -     | 66          |        |        |         |           |         |        |        |        |         |           |         |        |  |  |  |  |  |
| 38 | 1    | 4  | F      | 3.46  | 3.7   | 6.7 | 2738  | 39.2 | 7400  | 13.3  | 248  | 227 | 15.5 | 0.73 | 68   | AD                   | 75                               | -     | -    | -       | -        | -        | -         | -     | 56.6        |        |        |         |           |         |        |        |        |         |           |         |        |  |  |  |  |  |
| 39 | 20   | 3  | F      | 31.02 | 3.7   | 7.1 | 3547  | 39.4 | 8100  | 13    | 113  | 181 | 9.5  | 0.5  | 71   | depression           | 78                               | -     | -    | -       | -        | -        | -         | -     | 47          |        |        |         |           |         |        |        |        |         |           |         |        |  |  |  |  |  |
| 40 | 0    | 4  | F      | 4.98  | 3.3   | 7.2 | 939.9 | 36.7 | 3900  | 11.4  | 124  | 201 | 23.8 | 0.57 | 60   | AD                   | 91                               | -     | -    | -       | -        | -        | -         | -     | 31.4        |        |        |         |           |         |        |        |        |         |           |         |        |  |  |  |  |  |
| 41 | 1    | 4  | F      | 1.7   | 3.2   | 5.8 | 1191  | 40.9 | 7400  | 13.3  | 161  | 197 | 17.5 | 0.53 | 68   | AD                   | 79                               | -     | -    | -       | -        | -        | -         | -     | 33.5        |        |        |         |           |         |        |        |        |         |           |         |        |  |  |  |  |  |
| 42 | 1    | 4  | F      | 11.5  | 3.8   | 7.4 | 860.4 | 40.8 | 3600  | 13.6  | 105  | 183 | 12.5 | 0.68 | 63   | AD,SAH,CD            | 81                               | -     | -    | -       | -        | -        | -         | -     | 39.1        |        |        |         |           |         |        |        |        |         |           |         |        |  |  |  |  |  |
| 43 | 14   | 2  | M      | 7.39  | 3.9   | 6.7 | 824   | 43   | 4000  | 14.5  | 75   | 179 | 11.7 | 0.83 | 67   | CD                   | 73                               | -     | -    | -       | -        | -        | -         | -     | 59.6        |        |        |         |           |         |        |        |        |         |           |         |        |  |  |  |  |  |
| 44 | 1    | 4  | F      | 2.23  | 3.2   | 7   | 2044  | 41.4 | 7600  | 12.9  | 61   | 189 | 12.6 | 0.65 | 65   | AD                   | 94                               | -     | -    |         |          |          |           |       |             |        |        |         |           |         |        |        |        |         |           |         |        |  |  |  |  |  |
